# Supplementary material for: Action Schools! BC implementation: from efficacy to effectiveness to scale-up
Source: HighWire-hosted journal article supplement (doi:10.1136/bjsports-2013-093361), 2014-10-13
Supplement: bjsports-2013-093361supp.pdf [file bjsports-2013-093361supp.pdf]

**Supplementary Table 1.** Details of the published manuscripts and abstracts related to the Action Schools! BC efficacy trial.

| Author                | Sample                                                                                                      | Objective                                                                                                                        | Instrument                                                                                                                         | Outcomes                                                                                                                                | Statistical Analysis                                                                                                                                                                                                                                                    | Results                                                                                                                                                                                                                                                                                                                                             |
|-----------------------|-------------------------------------------------------------------------------------------------------------|----------------------------------------------------------------------------------------------------------------------------------|------------------------------------------------------------------------------------------------------------------------------------|-----------------------------------------------------------------------------------------------------------------------------------------|-------------------------------------------------------------------------------------------------------------------------------------------------------------------------------------------------------------------------------------------------------------------------|-----------------------------------------------------------------------------------------------------------------------------------------------------------------------------------------------------------------------------------------------------------------------------------------------------------------------------------------------------|
| Naylor et al [40]     | N = 10 schools (4 LS, 3 CS, 3 UP)<br><br>N = 7 administrators<br><br>N = 49 teachers<br><br>N = 26 students | 1. To describe the implementation (feasibility/fidelity) of AS! BC<br>2. To evaluate the impact of AS! BC on the provision of PA | 1. Teacher Activity Logs<br>2. Action Plans<br>3. Teacher surveys<br>4. Focus groups (Administrators, teachers, parents, students) | 1. Minutes per week of classroom PA.<br>2. Teacher compliance<br>3. Teacher satisfaction<br>4. Qualitative outcomes (from focus groups) | Physical activity:<br>Linear mixed model<br>- DV = minutes/week of PA<br>- Fixed effect = group<br>- Random effect = school<br>- Group x Phase (I or II) interaction included<br><br>Qualitative outcomes:<br>- NVivo and an editing analysis approach with open coding | 1. Physical activity delivered was significantly greater in LS and CS schools compared with UP schools (~10-12 min/day, $p < 0.05$ ).<br><br>2. Teacher compliance with AS! BC was moderate (75%).<br><br>3. Teachers were highly satisfied with training and support. Benefits of AS! BC included positive changes in students and school climate. |
| Macdonald et al. [44] | N = 410 (281 INT, 129 CON; 209 boys, 201 girls)                                                             | To determine if AS! BC was effective for increasing bone strength at the distal tibia and tibial midshaft.                       | Peripheral quantitative computed tomography (pQCT)                                                                                 | <b>Distal tibia:</b><br>Bone strength index (BSI)<br><br><b>Midshaft tibia:</b><br>Polar strength-strain index ( $SSI_p$ )              | Linear mixed model<br>- DV = change in BSI and $SSI_p$<br>- Fixed effect = group (INT, CON)<br>- Random effect = school<br>- Covariates = baseline bone value, baseline weight, change in leg length, change                                                            | 1. INT boys tended to have a greater gain in BSI and $SSI_p$ than CON boys, but the difference was only significant for BSI among prepubertal boys (BSI, $p = 0.03$ ).<br><br>2. Change in BSI and $SSI_p$ was similar between INT and                                                                                                              |

|                               |                                               |                                                                                               |                                                  |                                                                                                                                                                        |                                                                                                                                                                                                                                           |                                                                                                                                                                                         |
|-------------------------------|-----------------------------------------------|-----------------------------------------------------------------------------------------------|--------------------------------------------------|------------------------------------------------------------------------------------------------------------------------------------------------------------------------|-------------------------------------------------------------------------------------------------------------------------------------------------------------------------------------------------------------------------------------------|-----------------------------------------------------------------------------------------------------------------------------------------------------------------------------------------|
|                               |                                               |                                                                                               |                                                  |                                                                                                                                                                        | <p>in muscle area, final Tanner stage (girls)</p> <ul style="list-style-type: none"> <li>- Group x maturity (pre- or early pubertal) interaction</li> </ul>                                                                               | CON girls.                                                                                                                                                                              |
| Ahamed et al. [51]            | N = 287 (214 INT, 73 UP; 143 boys, 144 girls) | To assess the influence of school-based physical activity on children's academic performance. | Canadian Achievement Test (CAT-3)                | <b>Total score</b> – summation of scores from the math, reading and language/writing components                                                                        | <p>Linear mixed model</p> <ul style="list-style-type: none"> <li>- DV = Total score at followup</li> <li>- Fixed effects = group (INT, CON), sex</li> <li>- Random effect = school</li> <li>- Covariate = baseline Total score</li> </ul> | <p>1. No difference in Total Score between INT and UP at followup.</p> <p>2. Group x sex interaction not significant.</p>                                                               |
| Rhodes et al. (abstract) [52] | N = 344 children                              | To determine the effect of ASI BC on perceived competencies.                                  | Harter's perceived competence scale for children | <ol style="list-style-type: none"> <li>1. Athletic competence</li> <li>2. Social competence</li> <li>3. Academic competence</li> <li>4. General self-esteem</li> </ol> | <p>Repeated measures ANOVA</p> <ul style="list-style-type: none"> <li>- time x group interaction terms</li> </ul>                                                                                                                         | <p>1. Time x group interaction was not significant for any outcome.</p> <p>2. Significant main effect of time for all outcomes – perceived competencies decreased during the study.</p> |

|                           |                                                                       |                                                                                                                                                                                 |                                                                                                                        |                                                                                                                                                                                    |                                                                                                                                                                                                                                                                                                                                                                                                           |                                                                                                                                                                                                                                                                                                                                                                 |
|---------------------------|-----------------------------------------------------------------------|---------------------------------------------------------------------------------------------------------------------------------------------------------------------------------|------------------------------------------------------------------------------------------------------------------------|------------------------------------------------------------------------------------------------------------------------------------------------------------------------------------|-----------------------------------------------------------------------------------------------------------------------------------------------------------------------------------------------------------------------------------------------------------------------------------------------------------------------------------------------------------------------------------------------------------|-----------------------------------------------------------------------------------------------------------------------------------------------------------------------------------------------------------------------------------------------------------------------------------------------------------------------------------------------------------------|
| <p>Naylor et al. [42]</p> | <p>N = 444 children (165 LS, 146 CS, 133 UP; 225 boys, 219 girls)</p> | <p>To determine the effect of ASI BC model on children's physical activity levels.</p>                                                                                          | <p>1. Pedometers<br/>2. Physical Activity Questionnaire for Children (PAQ-C)</p>                                       | <p>1. Steps/day (average of 4 time points)<br/>2. Minutes of MVPA/day</p>                                                                                                          | <p>Linear mixed effects model</p> <ul style="list-style-type: none"> <li>- Fixed effect = group (LS, CS, UP)</li> <li>- Random effect = school</li> <li>- Analyses conducted for boys and girls together and separately</li> </ul>                                                                                                                                                                        | <p>1. Children in LS schools took ~1200 more steps per day than children in UP schools (<math>p = 0.04</math>). Analysis by gender showed this group difference to be significant for boys only.<br/>2. Girls in the CS group reported more minutes per day of PA than girls in the LS and UP groups (<math>p &lt; 0.05</math>).</p>                            |
| <p>Reed et al. [41]</p>   | <p>N = 237 (156 INT, 81 UP)<br/><br/>N = 77 for blood samples</p>     | <p>1. To determine if ASI BC is an effective model for decreasing CVD risk factors.<br/>2. To assess the CVD risk profile to the intervention in children deemed "at risk".</p> | <p>1. Leger's 20-m incremental shuttle run test<br/>2. Automated sphygmomanometer<br/>3. Intravenous blood samples</p> | <p>1. Fitness<br/>2. Systolic &amp; diastolic blood pressure<br/>3. Total cholesterol, high and low density lipoproteins, apolipoprotein B, C-reactive protein and fibrinogen.</p> | <p>ANCOVA</p> <ul style="list-style-type: none"> <li>- DV = fitness, BP, BMI, blood markers</li> <li>- Fixed effect = group (INT, UP)</li> <li>- Covariates = baseline value for each DV</li> </ul> <p>ANOVA (for 'at-risk' comparison of 4 groups with Bonferroni correction)</p> <ul style="list-style-type: none"> <li>- UP NORM</li> <li>- UP RISK</li> <li>- INT NORM</li> <li>- INT RISK</li> </ul> | <p>1. INT children had greater increases in fitness and lower increases in BP than UP children (<math>p &lt; 0.05</math>).<br/>2. INT children had larger (NS) decreases in all serum variables than UP children.<br/>3. INT children in the 'at-risk' group had significantly greater changes in BP and serum markers than INT children in the NORM group.</p> |

|                       |                                                 |                                                                                                                                                                                                           |                                                                              |                                                                                                                                                                                                                                                                                                                                                                                                   |                                                                                                                                                                                                                                                                                                                                                                  |                                                                                                                                                                                                                                                                                                                                        |
|-----------------------|-------------------------------------------------|-----------------------------------------------------------------------------------------------------------------------------------------------------------------------------------------------------------|------------------------------------------------------------------------------|---------------------------------------------------------------------------------------------------------------------------------------------------------------------------------------------------------------------------------------------------------------------------------------------------------------------------------------------------------------------------------------------------|------------------------------------------------------------------------------------------------------------------------------------------------------------------------------------------------------------------------------------------------------------------------------------------------------------------------------------------------------------------|----------------------------------------------------------------------------------------------------------------------------------------------------------------------------------------------------------------------------------------------------------------------------------------------------------------------------------------|
| Macdonald et al. [43] | N = 412 (294 INT, 117 CON; 213 boys, 199 girls) | 1. To evaluate the effectiveness of AS! BC for enhancing femoral neck bone strength in boys and girls.<br>2. To determine the effects of AS! BC on total body, lumbar spine and proximal femur bone mass. | 1. Dual energy X-ray absorptiometry (DXA)<br>2. Hip structure analysis (HSA) | <b>Femoral neck:</b> <ul style="list-style-type: none"> <li>- section modulus (FN- Z) (indicator of bone bending strength), cross-sectional area and subperiosteal width</li> <li>- Bone mineral content (BMC)</li> <li>- Bone area</li> </ul> <b>Total body, lumbar spine &amp; proximal femur</b> <ul style="list-style-type: none"> <li>- Bone mineral content</li> <li>- Bone area</li> </ul> | <b>Linear regression</b> <ul style="list-style-type: none"> <li>- DV = change in bone outcomes</li> <li>- variance inflation factor applied to standard error to account for clustered design</li> <li>- group = INT, CON</li> <li>- covariates = baseline height (girls) or weight (boys), change in height, change in lean mass, final Tanner stage</li> </ul> | 1. Change in FN-Z tended to be greater (+3.5%, p=0.1) in INT girls. This difference increased to 5.4% (p=0.05) in a per-protocol analysis that included girls who teachers reported at least 80% compliance.<br>2. INT boys had greater gains in BMC at the lumbar spine (+2.7%, p=0.05) and total body (+1.7%, p=0.03) than CON boys. |
|-----------------------|-------------------------------------------------|-----------------------------------------------------------------------------------------------------------------------------------------------------------------------------------------------------------|------------------------------------------------------------------------------|---------------------------------------------------------------------------------------------------------------------------------------------------------------------------------------------------------------------------------------------------------------------------------------------------------------------------------------------------------------------------------------------------|------------------------------------------------------------------------------------------------------------------------------------------------------------------------------------------------------------------------------------------------------------------------------------------------------------------------------------------------------------------|----------------------------------------------------------------------------------------------------------------------------------------------------------------------------------------------------------------------------------------------------------------------------------------------------------------------------------------|

LS = Liaison schools; CS = Champion schools; UP = Usual practice; AS! BC = Action Schools! BC; PA = physical activity; DV = dependent variable; IV = independent variable; INT = intervention; CON = control; CVD = cardiovascular disease; ANCOVA = analysis of covariance; ANOVA = analysis of variance
